# Supplementary material
Source: HighWire-hosted journal article supplement (https://www.cmaj.ca/highwire/filestream/57784/field_highwire_adjunct_files/6/mat-online-appendix_7.pdf)
Supplement: mat-online-appendix_7.pdf [file mat-online-appendix_7.pdf]

## Appendix 7: Results from included studies

| Author                    | Low birth weight |                                      |                                    | Preterm birth |                                       |                                    | Other results |                                                              |                                                               |
|---------------------------|------------------|--------------------------------------|------------------------------------|---------------|---------------------------------------|------------------------------------|---------------|--------------------------------------------------------------|---------------------------------------------------------------|
|                           | MN               | Control group                        | Adjusted risk                      | MN            | Control group                         | Adjusted risk                      | Outcome       | Multicomponent micronutrient                                 | Control                                                       |
| Christian <sup>1</sup>    | 249/705          | 218/635 (Fe/FA)<br>297/685 (Control) | N/A                                | 145/704       | 146/633 (Fe/FA)<br>140/685 (Control)  | N/A                                | BW*           | 2659±446 (705)                                               | 2652±436 (635) for Fe/FA group<br>2587±445 (685) for controls |
|                           |                  |                                      |                                    |               |                                       |                                    | SGA           | 757/1374                                                     | 327/633 (For Fe/FA group)<br>and 402/685 (for controls)       |
| Fawzi <sup>2</sup>        | 36/410           | 62/390                               | N/A                                | 96/410        | 106/390                               | N/A                                | SGA           | 39/410                                                       | 66/390                                                        |
| Fawzi <sup>3</sup>        | 306/3960         | 368/3906                             | N/A                                | 676/3993      | 666/4003                              | N/A                                | SGA           | 407/3827                                                     | 523/3823                                                      |
|                           |                  |                                      |                                    |               |                                       |                                    | BW            | 3148±530 (3960)                                              | 3083±510 (3906)                                               |
|                           |                  |                                      |                                    |               |                                       |                                    | GA            | 39.5±3.2 (3993)                                              | 39.4±3.2 (4003)                                               |
| Friis <sup>4</sup>        | 54/564           | 62/542                               | N/A                                | 85/564        | 99/542                                | N/A                                | BW†           | 3053 (564)                                                   | 3004 (542)                                                    |
|                           |                  |                                      |                                    |               |                                       |                                    | GA†           | 39.3 (564)                                                   | 39.0 (542)                                                    |
| Gupta <sup>5</sup>        | 12/74            | 31/72                                | 0.30 (0.13, 0.71)                  | 1/74          | 1/72                                  | N/A                                | BW            | 2667±373 (74)                                                | 2511±419 (72)                                                 |
|                           |                  |                                      |                                    |               |                                       |                                    | SGA           | 23/74                                                        | 37/72                                                         |
|                           |                  |                                      |                                    |               |                                       |                                    | GA            | 39.6 ± 1.4 (72)                                              | 39.6 ± 1.4 (74)                                               |
| Hinninger <sup>6</sup>    | 2/33<br>(<2.7kg) | 9/32 (<2.7 kg)                       | N/A                                | N/A           | N/A                                   | N/A                                | BW            | 3300±474 (33)                                                | 3049±460 (32)                                                 |
|                           |                  |                                      |                                    |               |                                       |                                    | GA            | 38.2±2.0 (32)                                                | 38.9±2.0 (32)                                                 |
| Kaestel <sup>7</sup>      | 83/750           | 51/373                               | N/A                                | N/A           | N/A                                   | N/A                                | BW*           | 3002±956 (360- for group 1);<br>3055±1062 (374, for group 2) | 3097±49 (366)                                                 |
| Osrin <sup>8</sup>        | 101/529          | 133/523                              | N/A                                | 47/571        | 54/568                                | N/A                                | BW*           | 2810±453 (529)                                               | 2733±422 (523)                                                |
|                           |                  |                                      |                                    |               |                                       |                                    | GA*           | 39.2±2.0 (568)                                               | 39.4±1.9 (571)                                                |
| Ramakrishnan <sup>9</sup> | 27/318           | 28/315                               | 0.98 (0.55, 1.74)                  | 24/321        | 21/321                                | 1.16 (0.60, 2.23)                  | IUGR          | 32/317                                                       | 37/314                                                        |
|                           |                  |                                      |                                    |               |                                       |                                    | BW*           | 2981±381 (318)                                               | 2977±393 (315)                                                |
|                           |                  |                                      |                                    |               |                                       |                                    | GA*           | 39.5±2.3 (321)                                               | 39.6±2.3 (321)                                                |
| Roberfroid <sup>10</sup>  | 77/526           | 82/526                               | 0.91 (0.65, 1.28)                  | 86/607        | 81/604                                | 1.04 (0.75, 1.45)                  | SGA           | 194/518                                                      | 213/512                                                       |
|                           |                  |                                      |                                    |               |                                       |                                    | BW            | 2914±450 (526)                                               | 2877±424 (526)                                                |
|                           |                  |                                      |                                    |               |                                       |                                    | GA            | 39.2±3.1 (607)                                               | 39.2±2.9 (604)                                                |
| Shankar <sup>11</sup>     | 510/5695         | 567/5406                             | N/A                                | 3736/14373    | 3654/14053                            | N/A                                | BW            | 3198±885 (5695)                                              | 3176±862 (5406)                                               |
| Zagre <sup>12</sup>       | 96/1328          | 103/1222                             | N/A                                | N/A           | N/A                                   | N/A                                | BW            | 3092±190 (1328)                                              | 3025±205 (1222)                                               |
| Zeng <sup>13</sup>        | 57/1406          | 66/1470 (Fe/FA)<br>82/1545 (control) | 0.78 (0.56, 1.08)<br>MN vs control | 78/1494       | 76/1537 (Fe/FA)<br>102/1666 (control) | 0.86 (0.64, 1.14)<br>MN vs control | SGA           | 238/1406                                                     | 278/1470 (Fe/FA)<br>280/1545 (control)                        |
|                           |                  |                                      |                                    |               |                                       |                                    | BW            | 3198±438 (1406)                                              | 3174±424 (1470) Fe/FA<br>3154±445 (1545) control              |
|                           |                  |                                      |                                    |               |                                       |                                    | GA            | 39.8±1.8 (1494)                                              | 39.8±1.7 (1537) Fe/FA<br>39.6±1.9 (1666) Control              |

Note: BW = birth weight, Fe = iron, FA = folic acid, GA = gestational age, IUGR = intrauterine growth restriction, LBW = low birth weight, MN = micronutrients, N/A = not available, SGA = small for gestational age.

\*Data presented as mean ± SD (n).

†Data represented as mean (n).

## References

1. Christian P, Khatry SK, Katz J, et al. Effects of alternative maternal micronutrient supplements on low birth weight in rural Nepal: double blind randomised community trial. *BMJ* 2003;326:571.
2. Fawzi WW, Msamanga GI, Spiegelman D, et al. Randomised trial of effects of vitamin supplements on pregnancy outcomes and T cell counts in HIV-1-infected women in Tanzania. *Lancet* 1998;351:1477-82.
3. Fawzi WW, Msamanga GI, Urassa W, et al. Vitamins and perinatal outcomes among HIV-negative women in Tanzania. *N Engl J Med* 2007;356:1423-31.
4. Friis H, Gomo E, Nyazema N, et al. Effect of multimicronutrient supplementation on gestational length and birth size: a randomized, placebo-controlled, double-blind effectiveness trial in Zimbabwe. *Am J Clin Nutr* 2004;80:178-84.
5. Gupta P, Ray M, Dua T, et al. Multimicronutrient supplementation for undernourished pregnant women and the birth size of their offspring: a double-blind, randomized, placebo-controlled trial. *Arch Pediatr Adolesc Med* 2007;161:58-64.
6. Hininger I, Favier M, Arnaud J, et al. Effects of a combined micronutrient supplementation on maternal biological status and newborn anthropometrics measurements: a randomized double-blind, placebo-controlled trial in apparently healthy pregnant women. *Eur J Clin Nutr* 2004;58:52-9.
7. Kaestel P, Michaelsen KF, Aaby P, et al. Effects of prenatal multimicronutrient supplements on birth weight and perinatal mortality: a randomised, controlled trial in Guinea-Bissau. *Eur J Clin Nutr* 2005;59:1081-9.
8. Osrin D, Vaidya A, Shrestha Y, et al. Effects of antenatal multiple micronutrient supplementation on birthweight and gestational duration in Nepal: double-blind, randomised controlled trial. *Lancet* 2005;365:916-7.
9. Ramakrishnan U, Gonzalez-Cossio T, Neufeld LM, et al. Multiple micronutrient supplementation during pregnancy does not lead to greater infant birth size than does iron-only supplementation: a randomized controlled trial in a semirural community in Mexico. *Am J Clin Nutr* 2003;77:720-5.
10. Roberfroid D, Huybregts L, Lanou H, et al. Effects of maternal multiple micronutrient supplementation on fetal growth: a double-blind randomized controlled trial in rural Burkina Faso. *Am J Clin Nutr* 2008;88:1330-40.
11. Shankar AH, Jahari AB, Sebayang SK, et al. Effect of maternal multiple micronutrient supplementation on fetal loss and infant death in Indonesia: a double-blind cluster-randomised trial. *Lancet* 2008;371:215-27.
12. Zagre NM, Desplats G, Adou P, et al. Prenatal multiple micronutrient supplementation has greater impact on birthweight than supplementation with iron and folic acid: a cluster-randomized, double-blind, controlled programmatic study in rural Niger. *Food Nutr Bull* 2007;28:317-27.
13. Zeng L, Dibley MJ, Cheng Y, et al. Impact of micronutrient supplementation during pregnancy on birth weight, duration of gestation, and perinatal mortality in rural western China: double blind cluster randomised controlled trial. *BMJ* 2008;337:a2001.
